# Supplementary material for: Human Breast Milk Promotes the Secretion of Potentially Beneficial Metabolites by Probiotic Lactobacillus reuteri DSM 17938
Source: PubMed Central journal article supplement (PMC6683045; doi:10.3390/nu11071548), 2019-07-09
Supplement: nutrients-11-01548-s001.pdf [file nutrients-11-01548-s001.pdf]

Supplementary Materials:

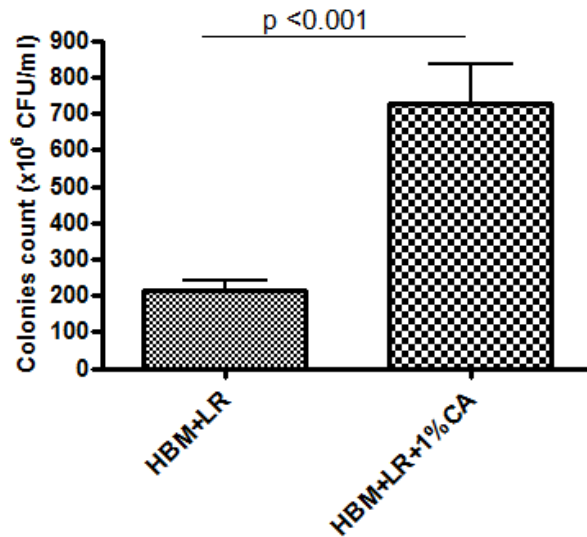

**Figure S1.** LR growth in HBM alone versus HBM + 1% CA. 1% CA, when supplemented to HBM, promoted LR growth more than three times as compared to LR growth in HBM alone ( $p < 0.001$ ).

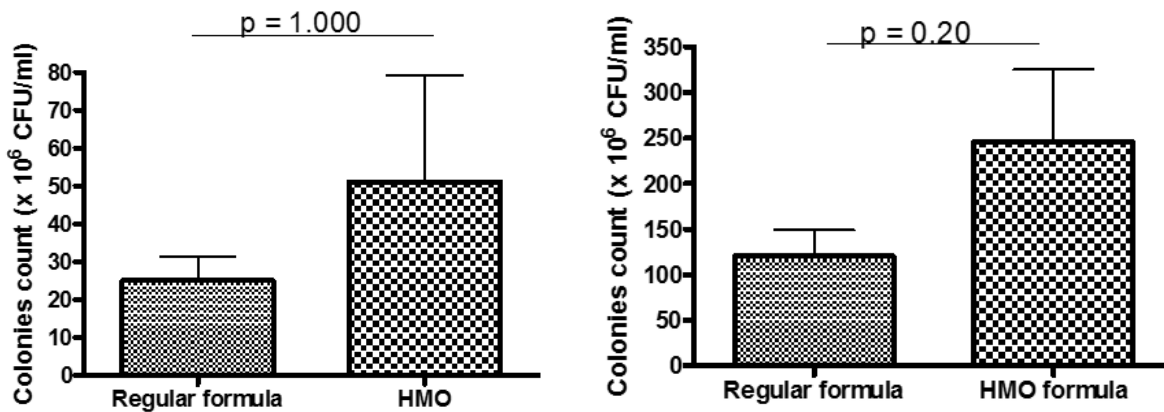

**Figure S2.** LR growth in regular formulas versus HMO formula, without casamino acid (left) and with casamino acid (right). LR growth was not significantly better in HMO formula versus regular formulas.

**Table S1.** elevated metabolites in HBM+LR versus formula + LR group, with 5 fold increase or higher.

| Cycle                                            | Metabolite       | HBM + LR/ Formula + LR |
|--------------------------------------------------|------------------|------------------------|
| Glycine, Serine and Threonine Metabolism         | Glycine          | 51.42                  |
|                                                  | Dimethylglycine  | 26.95                  |
|                                                  | Serine           | 17.13                  |
|                                                  | Threonine        | 10.00                  |
|                                                  | Allo-threonine   | 64.78                  |
| Alanine and Aspartate Metabolism                 | Alanine          | 8.15                   |
| Glutamate Metabolism                             | Glutamine        | 439.20                 |
| Histidine Metabolism                             | Trans-urocanate  | 41.96                  |
|                                                  | Cis-urocanate    | 7.02                   |
|                                                  | Anserine         | 9.35                   |
| Lysine Metabolism                                | Lysine           | 14.65                  |
| Phenylalanine Metabolism                         | Phenylalanine    | 6.17                   |
| Methionine, Cysteine, SAM and Taurine Metabolism | N-acetylcysteine | 12.51                  |
|                                                  | Cystine          | 21.67                  |

|                                             |                             |       |
|---------------------------------------------|-----------------------------|-------|
| Urea cycle; Arginien and Proline Metabolism | Citrulline                  | 9.76  |
| Polyamine Metabolism                        | Spermidine                  | 44.36 |
|                                             | 5-methylthioadenosine (MTA) | 30.47 |
| Glyoxylate Cycle                            | Succinate                   | 5.25  |

**Table S2.** Decreased lipids in HBM with LR in comparison with HBM without LR group.

| Cycle                                  | Metabolite                                          | HBM + LR/ HBM - LR |
|----------------------------------------|-----------------------------------------------------|--------------------|
| Medium Chain Fatty Acid                | caproate (6:0)                                      | 0.10               |
|                                        | heptanoate (7:0)                                    | 0.04               |
|                                        | caprylate (8:0)                                     | 0.02               |
|                                        | caprate (10:0)                                      | 0.04               |
|                                        | laurate (12:0)                                      | 0.05               |
|                                        | 5-dodecenoate (12:1n7)                              | 0.08               |
| Long Chain Fatty Acid                  | myristate (14:0)                                    | 0.05               |
|                                        | myristoleate (14:1n5)                               | 0.13               |
|                                        | palmitate (16:0)                                    | 0.10               |
|                                        | palmitoleate (16:1n7)                               | 0.06               |
|                                        | margarate (17:0)                                    | 0.14               |
|                                        | 10-heptadecenoate (17:1n7)                          | 0.07               |
|                                        | stearate (18:0)                                     | 0.17               |
|                                        | oleate/vaccenate (18:1)                             | 0.10               |
|                                        | nonadecanoate (19:0)                                | 0.24               |
|                                        | 10-nonadecenoate (19:1n9)                           | 0.08               |
|                                        | arachidate (20:0)                                   | 0.22               |
|                                        | eicosenoate (20:1)                                  | 0.08               |
|                                        | erucate (22:1n9)                                    | 0.08               |
|                                        | nervonate (24:1n9)*                                 | 0.08               |
| Polyunsaturated Fatty Acid (n3 and n6) | hexadecatrienoate (16:3n3)                          | 0.17               |
|                                        | stearidonate (18:4n3)                               | 0.10               |
|                                        | eicosapentaenoate (EPA; 20:5n3)                     | 0.05               |
|                                        | docosapentaenoate (n3 DPA; 22:5n3)                  | 0.08               |
|                                        | docosahexaenoate (DHA; 22:6n3)                      | 0.05               |
|                                        | docosatrienoate (22:3n3)                            | 0.20               |
|                                        | linoleate (18:2n6)                                  | 0.07               |
|                                        | linolenate [alpha or gamma; (18:3n3 or 6)]          | 0.06               |
|                                        | dihomo-linolenate (20:3n3 or n6)                    | 0.07               |
|                                        | arachidonate (20:4n6)                               | 0.05               |
|                                        | docosapentaenoate (n6 DPA; 22:5n6)                  | 0.07               |
|                                        | docosadienoate (22:2n6)                             | 0.06               |
|                                        | dihomo-linoleate (20:2n6)                           | 0.07               |
| Fatty Acid, Monohydroxy                | 2-hydroxyoctanoate                                  | 0.73               |
|                                        | 2-hydroxydecanoate                                  | 0.45               |
|                                        | 3-hydroxylaurate                                    | 0.24               |
|                                        | 3-hydroxymyristate                                  | 0.16               |
|                                        | 3-hydroxypalmitate                                  | 0.10               |
|                                        | 3-hydroxyoleate*                                    | 0.24               |
|                                        | 13-HODE + 9-HODE                                    | 0.13               |
| Lysophospholipid                       | 1-palmitoyl-GPC (16:0)                              | 0.11               |
|                                        | 2-palmitoyl-GPC (16:0)*                             | 0.28               |
|                                        | 1-linoleoyl-GPC (18:2)                              | 0.11               |
|                                        | 1-palmitoyl-GPE (16:0)                              | 0.27               |
|                                        | 2-stearoyl-GPE (18:0)*                              | 0.30               |
|                                        | 1-oleoyl-GPE (18:1)                                 | 0.15               |
|                                        | 1-linoleoyl-GPE (18:2)*                             | 0.14               |
|                                        | 1-arachidonoyl-GPE (20:4n6)*                        | 0.18               |
|                                        | 1-stearoyl-GPS (18:0)*                              | 0.24               |
|                                        | 1-linoleoyl-GPS (18:2)*                             | 0.09               |
|                                        | 1-palmitoyl-GPI (16:0)                              | 0.30               |
| 1-stearoyl-GPI (18:0)                  | 0.25                                                |                    |
| 1-linoleoyl-GPI (18:2)*                | 0.15                                                |                    |
| Plasmalogen                            | 1-(1-enyl-palmitoyl)-2-oleoyl-GPE (P-16:0/18:1)*    | 0.60               |
|                                        | 1-(1-enyl-palmitoyl)-2-linoleoyl-GPE (P-16:0/18:2)* | 0.58               |

|                                                                 |                                                        |                                      |      |
|-----------------------------------------------------------------|--------------------------------------------------------|--------------------------------------|------|
|                                                                 | 1-(1-enyl-palmitoyl)-2-palmitoyl-GPC (P-16:0/16:0)*    | 0.49                                 |      |
|                                                                 | 1-(1-enyl-palmitoyl)-2-arachidonoyl-GPE (P-16:0/20:4)* | 0.62                                 |      |
|                                                                 | 1-(1-enyl-palmitoyl)-2-oleoyl-GPC (P-16:0/18:1)*       | 0.39                                 |      |
|                                                                 | 1-(1-enyl-stearoyl)-2-oleoyl-GPE (P-18:0/18:1)         | 0.59                                 |      |
|                                                                 | 1-(1-enyl-stearoyl)-2-linoleoyl-GPE (P-18:0/18:2)*     | 0.59                                 |      |
|                                                                 | 1-(1-enyl-palmitoyl)-2-arachidonoyl-GPC (P-16:0/20:4)* | 0.43                                 |      |
|                                                                 | 1-(1-enyl-palmitoyl)-2-linoleoyl-GPC (P-16:0/18:2)*    | 0.44                                 |      |
|                                                                 | 1-(1-enyl-stearoyl)-2-arachidonoyl-GPE (P-18:0/20:4)*  | 0.60                                 |      |
| Monoacylglycerol                                                | 1-myristoylglycerol (14:0)                             | 0.04                                 |      |
|                                                                 | 1-pentadecanoylglycerol (15:0)                         | 0.07                                 |      |
|                                                                 | 1-palmitoylglycerol (16:0)                             | 0.07                                 |      |
|                                                                 | 1-palmitoleoylglycerol (16:1)*                         | 0.04                                 |      |
|                                                                 | 1-margaroylglycerol (17:0)                             | 0.06                                 |      |
|                                                                 | 1-oleoylglycerol (18:1)                                | 0.10                                 |      |
|                                                                 | 1-linoleoylglycerol (18:2)                             | 0.06                                 |      |
|                                                                 | 1-docosahexaenoylglycerol (22:6)                       | 0.06                                 |      |
|                                                                 | 2-myristoylglycerol (14:0)                             | 0.05                                 |      |
|                                                                 | 2-palmitoylglycerol (16:0)                             | 0.10                                 |      |
|                                                                 | 2-palmitoleoylglycerol (16:1)*                         | 0.08                                 |      |
|                                                                 | 2-oleoylglycerol (18:1)                                | 0.07                                 |      |
|                                                                 | 2-linoleoylglycerol (18:2)                             | 0.09                                 |      |
|                                                                 | 2-docosahexaenoylglycerol (22:6)*                      | 0.29                                 |      |
|                                                                 | 1-heptadecenoylglycerol (17:1)*                        | 0.23                                 |      |
|                                                                 | Sphingomyelins                                         | palmitoyl sphingomyelin (d18:1/16:0) | 0.45 |
|                                                                 |                                                        | stearoyl sphingomyelin (d18:1/18:0)  | 0.48 |
| tricosanoyl sphingomyelin (d18:1/23:0)*                         |                                                        | 0.57                                 |      |
| lignoceroyl sphingomyelin (d18:1/24:0)                          |                                                        | 0.61                                 |      |
| sphingomyelin (d18:1/14:0, d16:1/16:0)*                         |                                                        | 0.37                                 |      |
| sphingomyelin (d17:1/16:0, d18:1/15:0, d16:1/17:0)*             |                                                        | 0.40                                 |      |
| sphingomyelin (d18:2/16:0, d18:1/16:1)*                         |                                                        | 0.29                                 |      |
| sphingomyelin (d18:1/17:0, d17:1/18:0, d19:1/16:0)              |                                                        | 0.47                                 |      |
| sphingomyelin (d18:1/18:1, d18:2/18:0)                          |                                                        | 0.39                                 |      |
| sphingomyelin (d18:1/20:1, d18:2/20:0)*                         |                                                        | 0.37                                 |      |
| sphingomyelin (d18:1/21:0, d17:1/22:0, d16:1/23:0)*             |                                                        | 0.47                                 |      |
| sphingomyelin (d18:1/22:1, d18:2/22:0, d16:1/24:1)*             |                                                        | 0.44                                 |      |
| sphingomyelin (d18:2/23:0, d18:1/23:1, d17:1/24:1)*             |                                                        | 0.44                                 |      |
| sphingomyelin (d18:1/24:1, d18:2/24:0)*                         |                                                        | 0.48                                 |      |
| sphingomyelin (d18:2/24:1, d18:1/24:2)*                         |                                                        | 0.45                                 |      |
| sphingomyelin (d18:1/25:0, d19:0/24:1, d20:1/23:0, d19:1/24:0)* |                                                        | 0.40                                 |      |
